# Supplementary material for: Differential Expression Patterns of Glycolytic Enzymes and Mitochondria-Dependent Apoptosis in PCOS Patients with Endometrial Hyperplasia, an Early Hallmark of Endometrial Cancer, In Vivo and the Impact of Metformin In Vitro
Source: PubMed Central journal article supplement — Int J Biol Sci. 2019 Jan 24;15(3):714–25. doi: 10.7150/ijbs.31425 (PMC6367580; doi:10.7150/ijbs.31425), 2019-01-24
Supplement: ijbsv15p0714s1.pdf [file ijbsv15p0714s1.pdf]

1 **Supplemental Table 1.** Antibodies: species, clone/catalog number, molecular weight, method, dilution, and  
 2 source.

| Antibody             | Species | Cat. No. | kDa | Method    | Dilution       | Source                                     |
|----------------------|---------|----------|-----|-----------|----------------|--------------------------------------------|
| HK1                  | Rabbit  | 2024     | 102 | WB        | 1:100          | Cell Signaling Technology<br>(Danver, MA)  |
| HK2                  | Rabbit  | 2867     | 102 | WB        | 1:100          | Cell Signaling Technology                  |
| PFK                  | Rabbit  | 8164     | 80  | WB        | 1:100          | Cell Signaling Technology                  |
| GAPDH                | Rabbit  | 5174     | 37  | WB        | 1:200          | Cell Signaling Technology                  |
| PKM2                 | Rabbit  | 4053     | 60  | WB        | 1:100          | Cell Signaling Technology                  |
| LDHA                 | Rabbit  | 3582     | 37  | WB        | 1:100          | Cell Signaling Technology                  |
| PDH                  | Rabbit  | 3205     | 43  | WB<br>IHC | 1:100<br>1:200 | Cell Signaling Technology                  |
| TFAM                 | Rabbit  | 7495     | 24  | WB        | 1:500          | Cell Signaling Technology                  |
| ER $\alpha$          | Mouse   | 6F11     | 66  | WB<br>IF  | 1:500<br>1:200 | Novocastra Laboratories<br>(Newcastle, UK) |
| ER $\beta$           | Rabbit  | 68-4     | 59  | WB        | 1:500          | Millipore (Darmstadt, Germany)             |
| Cytochrome C         | Rabbit  | 11940    | 14  | WB        | 1:500          | Cell Signaling Technology                  |
| Cleaved<br>caspase-3 | Rabbit  | 9664     | 19  | WB        | 1:500          | Cell Signaling Technology                  |
| $\beta$ -actin       | Mouse   | A1978    | 40  | WB        | 1:500          | Sigma-Aldrich (St. Louis, MO)              |
| AR                   | Rabbit  | 5153     |     | IHC       | 1:100          | Cell Signaling Technology                  |

3

4 HK1, hexokinase 1; PFK, phosphofructokinase; GAPDH, glyceraldehyde-3-phosphate dehydrogenase; PKM2,  
 5 pyruvate kinase isozyme M2 isoform; LDHA, lactate dehydrogenase A; PDH, pyruvate dehydrogenase; TFAM,  
 6 mitochondrial transcription factor A; ER $\alpha$ , estrogen receptor  $\alpha$ ; AR, androgen receptor; WB, Western blot  
 7 analysis; IHC, immunohistochemistry; IF, immunofluorescence.

8

9

10

11

12

13
